# Supplementary material for: Swim Training Affects on Muscle Lactate Metabolism, Nicotinamide Adenine Dinucleotides Concentration, and the Activity of NADH Shuttle Enzymes in a Mouse Model of Amyotrophic Lateral Sclerosis
Source: MDPI journal article supplement (doi:10.3390/ijms231911504), 2022-09-29
Supplement: s1 [file s1]

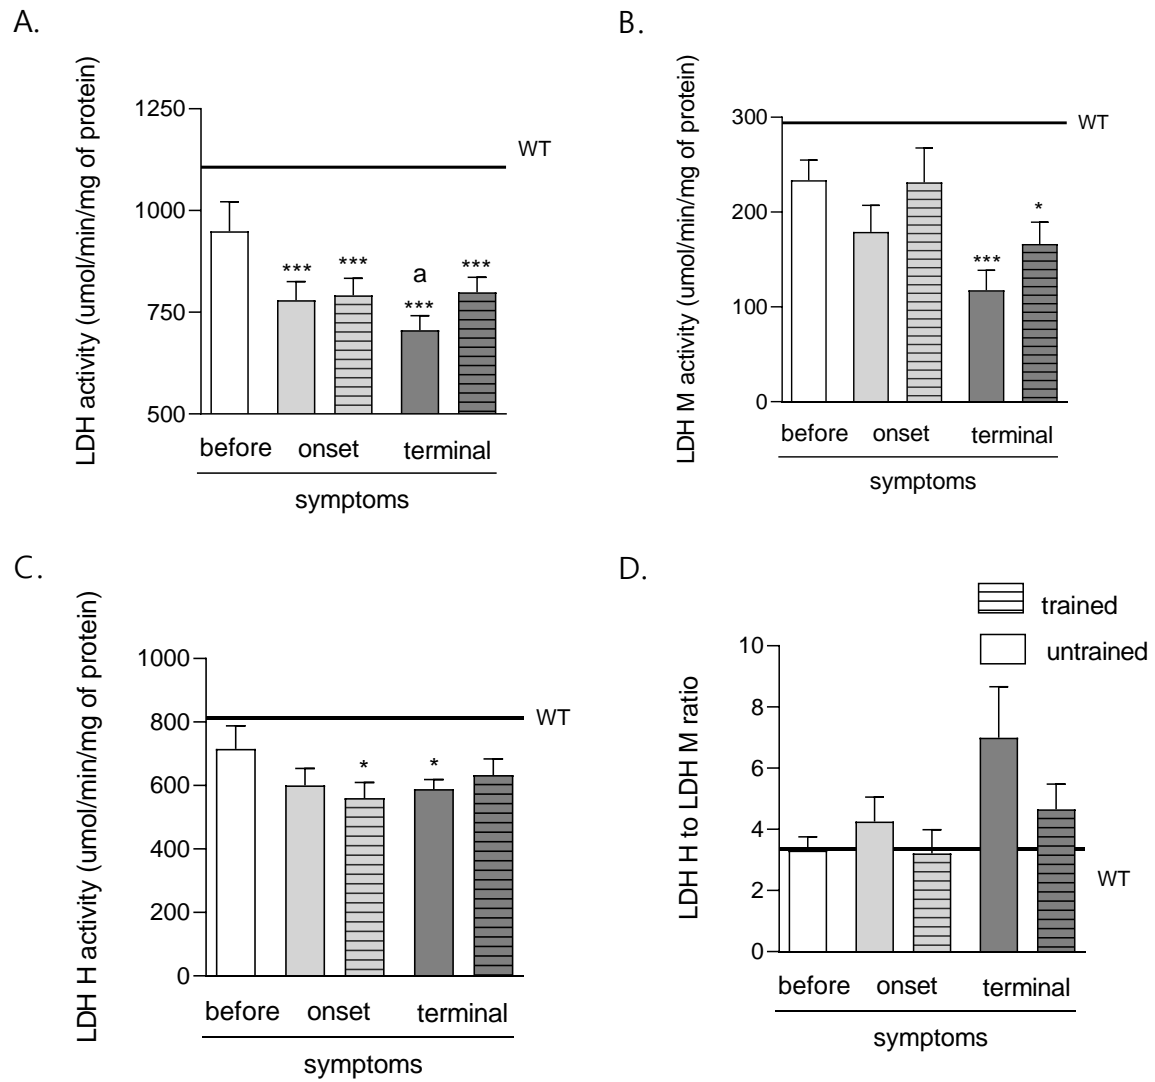

**Figure S1.** Effects of ALS disease progression and swim training on skeletal muscle total LDH, LDH H and M subunits activities and LDH H to M subunits ratio.

Total LDH (A), LDH H to M subunits ratio (B), LDH M subunit (C), and LDH H subunit (D) were measured in the mice *tibialis anterior* muscle. There were significant differences between the groups: \* $p < 0.05$ , \*\*\* $p < 0.001$  vs. WT group of mice, <sup>a</sup> $p < 0.05$ , vs. BEFORE group (Tukey's post-hoc test). The data are presented as the means  $\pm$  SEM ( $n = 7$  in each group).
